# **IFN $\gamma$ drives neuroinflammation and demyelination in a mouse model of multiple system atrophy**

Nicole J. Gallups<sup>1</sup>, Gabrielle M. Childers<sup>1</sup>, Jhodi M. Webster<sup>1</sup>, Asta Zane<sup>1</sup>, Ya-Ting Yang<sup>1</sup>, Nikhita Mudium<sup>1</sup>, Fredric P. Manfredsson<sup>2,3</sup>, Jeffrey H. Kordower<sup>2</sup>, and Ashley S. Harms<sup>1\*</sup>

## **Author affiliations:**

1 University of Alabama at Birmingham, Department of Neurology, Center for Neurodegeneration and Experimental Therapeutics, Birmingham, AL

2 ASU-Banner Neurodegenerative Disease Research Center, Biodesign Institute, Arizona State University, Tempe, AZ

3 Barrow Neurological Institute, Department of Translational Neuroscience, Phoenix, AZ

\*Correspondence to: Ashley S. Harms

University of Alabama at Birmingham, 1719 6<sup>th</sup> Ave South, Birmingham, Alabama 35294

anharms@uab.edu

**Running title:** IFN $\gamma$  drives MSA pathology

## Abstract

Multiple system atrophy (MSA) is a rare and fatal synucleinopathy characterized by insoluble alpha-synuclein ( $\alpha$ -syn) cytoplasmic inclusions located within oligodendroglia. Neuroinflammation, demyelination, and neurodegeneration are correlated with areas of GCI pathology, however it is not known what specifically drives disease pathogenesis. Recently in a mouse model of MSA, CD4<sup>+</sup> T cells have been shown to drive neuroinflammation and demyelination, however the mechanism by which this occurs also remains unclear. In this study we use genetic and pharmacological approaches in a novel model of MSA to show that the pro-inflammatory cytokine interferon gamma (IFN $\gamma$ ) drives neuroinflammation and demyelination. Furthermore, using an IFN $\gamma$  reporter mouse, we found that infiltrating CD4<sup>+</sup> T cells were the primary producers of IFN $\gamma$  in response to  $\alpha$ -syn overexpression in oligodendrocytes. Results from these studies indicate that IFN $\gamma$  expression in CD4 T cells drives  $\alpha$ -syn-mediated neuroinflammation and demyelination, and strategies to target IFN $\gamma$  expression may be a potential disease modifying therapeutic strategy for MSA.

**Keywords:** multiple system atrophy, neuroinflammation, alpha-synuclein, T cells, interferon gamma,

**Abbreviations:**  $\alpha$ -syn = alpha-synuclein, APC = antigen presenting cells, GCI = glial cytoplasmic inclusions, IFN $\gamma$  = Interferon gamma, IFN $\gamma$ R1 = interferon gamma receptor 1, MHCII = major histocompatibility complex II, MSA = multiple system atrophy, PD = Parkinson's disease

## Introduction

Multiple system atrophy (MSA) is a rare, rapidly progressive, and fatal demyelinating synucleinopathy with no known disease modifying therapy<sup>1,2</sup>. Unlike other synucleinopathies such as Parkinson disease (PD), MSA pathology is characterized by severe autonomic failure and rapidly progressive demyelination and neurodegeneration associated with alpha-synuclein ( $\alpha$ -syn) containing glial cytoplasmic inclusions (GCIs) within oligodendrocytes<sup>1,3,4</sup>. MSA is divided into two subtypes, MSA-Parkinsonian (MSA-P) and MSA-Cerebellar (MSA-C). MSA-P is the most common, affecting 80% of patients and neurodegeneration occurs primarily within the striatonigral pathway<sup>1</sup>. MSA-C leads to olivopontocerebellar atrophy<sup>1</sup>. Although the areas of degeneration differ depending on MSA subtype, GCI pathology is present in vulnerable and resistant regions across the neuraxis. In addition to GCI's within oligodendroglia, there is significant astrogliosis as well. GCI pathology is associated with significant neuroinflammation, demyelination, and neurodegeneration<sup>1,2,5</sup>. However, the mechanism by which GCI pathology leads to neuroinflammation, demyelination, and neurodegeneration is currently unknown.

Previous studies have shown neuroinflammation as a pathological hallmark of MSA. In MSA post-mortem brains, widespread astrogliosis and microgliosis are present within areas of neurodegeneration and demyelination<sup>1,2,5</sup>. The expression of major histocompatibility complex II (MHCII), the equivalent of human leukocyte antigen-DR (HLA-DR) in humans, is found on antigen presenting cells (APCs) within the CNS<sup>6</sup>. In post-mortem MSA brains, our previous study shows that  $\alpha$ -syn GCI pathology is accompanied by MHCII<sup>+</sup> expression and increased infiltration of peripheral T cells (CD4<sup>+</sup>, CD8<sup>+</sup>)<sup>6</sup>. Using a novel modified AAV in which human  $\alpha$ -syn is overexpressed in oligodendroglia (Olig001-SYN)<sup>7,8</sup> we observed significant neuroinflammation, demyelination, and neurodegeneration. Thus, effectively modeling MSA in rodents and non-human primates<sup>9</sup>. Using this Olig001-SYN model of MSA, we also demonstrated significant MHCII induction on CNS resident microglia and infiltrating macrophages, along with the infiltration of CD4 and CD8 T cells, similar to that observed in post-mortem brains<sup>6</sup>. Using mice that are genetically deficient in CD4 T cells, we found that Olig001-SYN induced-MHCII expression, infiltration of peripheral immune cells, and demyelination were attenuated, indicating a disease driving role of adaptive immunity, specifically CD4<sup>+</sup> T cells in MSA pathogenesis<sup>6</sup>. Interestingly, upon further investigation of T cells isolated from Olig001-SYN transduced mice,  $\alpha$ -syn overexpression resulted in significant

production of the proinflammatory cytokine interferon gamma (IFN $\gamma$ )<sup>6</sup>. As infiltrating T cells are a significant source of IFN $\gamma$ , it is not currently known whether IFN $\gamma$  mediates mechanisms that drive MSA pathogenesis.

IFN $\gamma$  is an important pro-inflammatory cytokine. In response to proinflammatory stimuli, immune cells such as T cells, myeloid cells, natural killer cells, and B cells can produce IFN $\gamma$  leading to MHC mediated antigen presentation<sup>10,11</sup>. IFN $\gamma$  released from CD4<sup>+</sup> T cells, particularly the Th1 subtype, enhances inflammation by binding to its receptor (IFN $\gamma$ R1) and, via the JAK/STAT pathway, activates genes responsible for T cell differentiation, T cell activation, and MHCII antigen presentation. In other demyelinating diseases like multiple sclerosis (MS), IFN $\gamma$  is significantly increased. In experimental autoimmune encephalomyelitis (EAE), a mouse model for MS, neutralizing via an antibody against IFN $\gamma$  attenuated neurodegeneration and neuroinflammation<sup>12,13</sup>. Furthermore, when Tbet (a transcription factor required for CD4<sup>+</sup> T cell differentiation into Th1) was genetically knocked out in mice, it prevented the development of EAE<sup>14</sup>. Like MS, IFN $\gamma$  is significantly increased in the CSF of MSA patients, however, no follow up studies have been conducted to determine if the IFN $\gamma$  is pathogenic<sup>15,16</sup>. Although IFN $\gamma$  is an important mediator of neuroinflammation in demyelinating disease<sup>12,17</sup>, there are currently no studies investigating a similar role of IFN $\gamma$  in neuroinflammation and demyelination in MSA.

In this study, we sought to determine whether IFN $\gamma$  is responsible for  $\alpha$ -syn-mediated neuroinflammation and demyelination in the Olig001-SYN mouse model of MSA-P. Utilizing genetic and pharmacological approaches, global IFN $\gamma$  targeting using genetic knockout mice or an IFN $\gamma$  neutralizing antibody (XMG 1.2), attenuated  $\alpha$ -syn mediated neuroinflammation and demyelination. Furthermore, using a novel Thy1.1/IFN $\gamma$  reporter mouse, we determined that IFN $\gamma$  was expressed primarily by CD4<sup>+</sup> T cells and minimally in other immune cells in response to  $\alpha$ -syn overexpression, suggesting that CD4 T cells mediates disease progression. These findings indicate that IFN $\gamma$ , primarily produced by Th1 T cells, drives neuroinflammation and demyelination in MSA, highlighting IFN $\gamma$  as a potential therapeutic target in the treatment of MSA.

## Materials and methods

### Mice

Male and female C57BL/6 (#000664 Jackson Laboratories) were used for these studies and maintained on a congenic background. IFN $\gamma$ /Thy1.1 reporter mice with a C57BL/6 background (generously donated by Dr. Casey Weaver) were also used and have been previously described and characterized<sup>18</sup>. Additionally, male and female Tbet  $-/-$  mice (#004648 Jackson Laboratories) were used. Under a C57BL/6 background, these mice have exon 1 of the T-box 21 (*Tbx21*) deleted. All research conducted on animals were approved by the Institutional Animal Care and Use Committee at the University of Alabama at Birmingham (UAB).

### Olig001 vector

The Olig001 vector is a modified AAV capsid generated via directed evolution that has been characterized previously<sup>7-9</sup>. Briefly, the Olig001 capsid has a >95% tropism for oligodendrocytes and the vectors utilized contained the CBh promoter and bovine growth hormone polyA, controlling the expression of either transgene (human  $\alpha$ -syn or GFP as control). The Olig001 vector was provided by the University of North Carolina Vector Core facility.

### Stereotaxic surgery

Male and female mice aged to 8-12 weeks, were anesthetized with isoflurane applied by an isoflurane vaporizing instrument provided by the Animal Resource Program at UAB. Using a Hamilton syringe and an automatic injecting system, mice were unilaterally (Luxol Fast Blue, DAB and immunofluorescence staining; n=5) or bilaterally (flow cytometry; n=5) injected with 2  $\mu$ l of Olig001-GFP ( $1 \times 10^{13}$  vector genomes (vg)/ml) or Olig001-SYN ( $1 \times 10^{13}$  vg/ml) into the dorsolateral striatum at a rate of 0.5  $\mu$ l/min to mimic MSA-P. The needle was left in

the injection site for an additional 2 min and then slowly retracted over the course of 2 min. The stereotaxic coordinates used from bregma were AP + 0.7 mm, ML +/- 2.0 mm, and DV - 2.9 mm from dura. All surgical protocols and aftercare were followed and approved by the Institutional Animal Care and Use Committee at the University of Alabama at Birmingham.

## **Immunohistochemistry tissue preparation**

Four weeks post transduction of the Olig001 virus, mice were anesthetized and transcardially perfused with 0.01M Phosphate-buffered saline (PBS) pH 7.4, followed by a fixation with 4% paraformaldehyde (in PBS, pH 7.4; PFA). Brains were dissected and incubated in 4% PFA solution for 4 hours at 4°C. After PFA fixation, the brains were cryoprotected in a 30% sucrose (in PBS) solution for 3 days until brains were fully saturated. Brains were frozen and cryosectioned coronally at 40µm on a sliding microtome. Tissue was stored in a 50% glycerol/PBS solution at -20°C.

## **Immunofluorescence**

Forty-µm thick free-floating sections were washed in 0.01M tris-buffered solution (TBS; pH 7.4) 3 X for 5 minutes. The tissue then underwent an antigen retrieval process for 30 minutes at 37°C. After antigen retrieval the free-floating sections were washed and blocked in 5% normal serum for 1 to 2 hours. The sections were thereafter incubated in 1% serum in TBS-Triton (TBST) primary antibody solution consisting of one of the following antibodies: anti-Iba1 (1:500, WACO), anti-Olig2 (1:250, clone SP07-02; R&D), anti-GFAP (1:500, clone DIF48; Abcam), anti-CD (1:500, clone 4SM15; eBioscience), anti-Thy1.1 (1:500, OX-7; Invitrogen) anti-CD4 (1:500, clone RM4-5; Thermo Fisher), anti-NK1.1 (1:250, clone EPR22990-12; Abcam). After an overnight incubation, the free-floating sections were washed and put into a 1% serum TBST secondary solution for 2 hours. Sections were mounted onto coated glass slides, and cover slipped using hard set mounting medium (Vector Laboratories). Fluorescence images were collected on a Ti2 Nikon microscope using a Ci2 confocal system.

## **DAB labeling and quantification**

Free floating striatal sections were quenched in a 3% hydrogen peroxide/50% methanol in 0.01M TBS (pH 7.4) solution at room temp for 5 minutes. After three TBS washes, tissue was incubated in antigen retrieval sodium citrate solution for 30 minutes at 37°C. Background staining was blocked in 5% serum and incubated with either an anti-MHCII (1:500, M5/114.15.2; Thermo Fisher) or a pSer129 (1:5000, clone EPI53644; Abcam) antibody 1% serum overnight at 4°C. The following day, sections were incubated with a biotinylated goat anti-rat IgG secondary antibody (1:1000, Vector Labs) in a 1% serum TBST solution. The R.T.U Vectastain ABC Reagent kit and DAB kits (Vector Labs) were used to develop the stain according to manufacturer's protocol. Striatal sections were mounted onto plus coated slides and dehydrated with a gradient of ethanol solutions. Lastly slides were cover slipped with Permount (Electron Microscopy Sciences). Slides were imaged at 10X on a Zeiss imager M2 brightfield microscope (MBF Biosciences). Data was analyzed in ImageJ and the fold change of signal between the ipsi- and contra-lateral side were calculated.

## **Interferon gamma neutralizing antibody treatment**

C57BL/6 mice were pretreated three days before i.p. injection of either a neutralizing IFN $\gamma$  antibody (clone XMG1.2; 200ng; n=5) or isotype control (IgG1; 200ng; n=5). Three days following the initial i.p. injection, mice received an injection of either Olig001-GFP or Olig001-SYN in the dorsolateral striatum. Immediately after vector injection, mice were given an i.p. dose of their respective treatment. To continue their treatment, mice were injected every three days i.p. with 200ng of either neutralizing IFN $\gamma$  or the isotype control. After 30 days, mice were anesthetized for their respected endpoints.

## **Luxol Fast Blue staining and quantification**

Forty- $\mu$ m thick mounted brain sections were quickly washed with DI water and incubated in a 0.1% Luxol Fast Blue solution at 60°C for 2 hours. Excess dye was removed with running DI water. To differentiate and visualize the myelin from the rest of the tissue, slides were dipped in a 0.05% Lithium Carbonate solution 2X for 1 minute, followed by three 70% ethanol washes. This differentiation step was repeated until the myelin was stained blue and non-lipid parts of the tissue were clear. Slides were quickly dehydrated and mounted with Permount (Electron Microscopy Sciences). Images were taken at 10X on a Zeiss Axio Imager M2 microscope (MFB Biosciences). Images were quantified with ImageJ. Fold change of contra- to ipsi-lateral were calculated based on mean grey value.

## **Mononuclear cell sorting and flow cytometry**

Four weeks post Olig001 delivery, mice were anesthetized and transcardially perfused with 0.01M PBS pH 7.4. Brain tissue was removed and the striata were dissected. Striatal tissues were triturated and digested with 1 mg/mL Collagenase IV (Sigma) and 20  $\mu$ g/mL DNase I (Sigma) diluted in RPMI 1640 with 10% heat inactivated fetal bovine serum, 1% glutamine (Sigma), and 1% Penicillin–Streptomycin (Sigma). After enzyme digestion, samples were filtered through a 70  $\mu$ m filter and mononuclear cells were separated out using a 30/70% percoll gradient (GE).

For all cell labeling, isolated cells were blocked with anti-Fc $\gamma$  receptor (1:100; BD Biosciences). Cell surfaces were labeled with the following fluorescent-conjugated antibodies against CD45 (clone 30-F11; eBioscience), CD11b (clone M1/70; BioLegend), MHCII (clone M5/114.15.2; BioLegend), Ly6C (clone HK1.4; BioLegend), CD4 (clone GK1.5; BioLegend), CD8a (clone 53.6.7; BioLegend), Thy1.1 (clone HIS51; BD Biosciences), or hCD2 (clone RPA2.10; eBioscience). A fixable viability dye was used to distinguish live cells per manufacturer's instructions (Fixable Near-IR LIVE/DEAD Stain Kit, Invitrogen).

For intracellular transcription factor labeling, the Foxp3/Transcription Factor Staining Kit (eBioscience) was used accordingly with fluorescent-conjugated antibodies against FOXP3 (clone FJK-16S; eBioscience), T-bet (clone 4B10; BioLegend), GATA2 (clone 16E10A23; BioLegend), ROR $\gamma$ t (clone Q31-378; BD Biosciences). An Attune Nxt (Thermo Fisher Scientific) or a BD Symphony flow cytometer (BD Sciences) were used to analyze samples and Flow Jo (Tree Star) software were used for analysis. Mean cell count numbers, percentages, and mean fluorescent intensity (MFI) will be measured with FlowJo software to assess for neuroinflammation.

## **Statistical Analysis**

All graphs and corresponding statistical tests were generated or performed using Prism software (GraphPad). For Flow cytometry data points were compared across time points/antibody treatment using either an independent factorial ANOVA and a Bonferroni's post hoc test (with 95% confidence and  $p < 0.05$ ) or unpaired students t-test (with 95% confidence and  $p < 0.05$ ).

## **Data availability**

The authors affirm that the findings of this manuscript are supported by the data therein. Additional information can be requested from the corresponding author.

## Results

### Genetically deleting IFN $\gamma$ attenuates neuroinflammation in the Olig001-SYN model of MSA

IFN $\gamma$  induces MHCII expression on the cell surface of APCs<sup>10</sup>. To determine if Olig001-SYN induced neuroinflammation as a result of induction of IFN $\gamma$  expression, we utilized mice in which the required transcription factor for IFN $\gamma$  production, Tbet, was deleted (Tbet  $-/-$ ). Tbet  $-/-$  mice and their WT littermate controls, aged 8-12 weeks, received Olig001-SYN (or GFP as control) in the dorsolateral striatum (Fig. 1a). 4 weeks post vector delivery, using immunohistochemistry and mononuclear cell isolation and flow cytometry, we found that Tbet  $-/-$  mice showed a reduction in infiltrating Ly6C<sup>+</sup> monocytes (CD11b<sup>+</sup>, CD45hi, Ly6C<sup>+</sup>) (Fig. 2b and c). Within the monocyte population there was no difference in MHCII expression (Fig. 1c). In response to  $\alpha$ -syn expression, Tbet  $-/-$  mice displayed no change in the number of microglia within the striatum (Fig. 1c), however, in the absence of Tbet, a significant reduction in MHCII expression was observed on microglia (CD11b<sup>+</sup> CD45lo) via flow cytometry (Fig. 1c). Consistent with our flow cytometry results, utilizing immunohistochemistry, we observed a decrease in MHCII expression in the dorsolateral striatum (Fig. 1e and f) indicating that Tbet expression is needed for IFN $\gamma$ -mediated induction of MHCII expression in the CNS and peripheral monocyte entry.

To determine whether IFN $\gamma$  is responsible for T cell infiltration in response to  $\alpha$ -syn overexpression, we performed mononuclear cell isolation and flow cytometry 4 weeks post vector delivery in WT and Tbet  $-/-$  mice. Tbet  $-/-$  mice displayed a decrease in the infiltration of CD4<sup>+</sup> T cells (Fig. 2b) and an increase of CD8<sup>+</sup> T cells (Fig. 2b) indicating  $\alpha$ -syn-mediated neuroinflammation is caused by Th1<sup>+</sup> CD4 T cells. Given our previous observations showing that CD4<sup>+</sup> T cells are required for MSA pathology, we further investigated the CD4<sup>+</sup> T cell response. In the dorsolateral striatum, compared to WT mice, Tbet $-/-$  mice displayed a reduction of CD4<sup>+</sup> T cells in close apposition to the pSer129<sup>+</sup> GCI pathology (Fig. 2c). Within the CD4<sup>+</sup> T cell population, there were significant changes among the T cell subsets Th1, Th17, and T<sub>reg</sub> including a reduction in the number of Th1 and Th17 cells (Fig. 2d). Conversely, there was a significant increase in the number of Treg within the CD4<sup>+</sup> T cell population, suggesting

that loss of Tbet mediated IFN $\gamma$  expression shifts the T cell repertoire from a pro-inflammatory (Th1, Th17) to a restorative (T<sub>reg</sub>) state. As IL-17 produced by T cells can also contribute to proinflammatory or autoimmune responses<sup>19-21</sup>, we performed immunohistochemistry and flow cytometry on WT and ROR $\gamma$ t<sup>-/-</sup> mice treated with both groups were treated with Olig001-SYN. Four weeks post-delivery, ROR $\gamma$ t<sup>-/-</sup> mice overexpressing  $\alpha$ -syn in oligodendrocytes showed no attenuation of MHCII expression and enhanced demyelination compared to WT mice (Supplemental Fig 1) indicating that IL-17 producing Th17 cells do not drive Olig001-SYN mediated neuroinflammation and demyelination.

## **IFN $\gamma$ mediates demyelination in the Olig001-SYN mouse model of MSA**

Demyelination is a key feature of MSA pathology<sup>1</sup>. To assess how IFN $\gamma$  contributes to this pathology, Tbet<sup>-/-</sup> and their WT littermate controls, 8-12 weeks of age, were injected with Olig001-SYN in the dorsal lateral striatum (Fig 3a). At 4 weeks post-transduction myelination was assessed via luxol fast blue staining. Compared to WT mice, Tbet<sup>-/-</sup> mice displayed a fourfold increase in the degree of myelination in the dorsolateral striatum and corpus callosum (Fig 3c). The preservation of myelin seen in Tbet<sup>-/-</sup> is comparable to healthy, non-inflamed mouse striatum (Fig 3b) indicating Tbet mediated IFN $\gamma$  expression is required for demyelination in the Olig001-SYN mouse model.

## **Pharmacologically targeting IFN $\gamma$ attenuates Olig001-SYN mediated neuroinflammation**

Although the experimentation in the Tbet<sup>-/-</sup> mouse demonstrated a role of IFN $\gamma$  in Olig001-SYN-mediated pathology, this holds little translational value. To that end, a key question remains: can targeting IFN $\gamma$  pharmacologically provide a therapeutic benefit? To determine if IFN $\gamma$  neutralization attenuates Olig001-SYN mediated neuroinflammation and demyelination, an IFN $\gamma$  neutralizing antibody was used to globally deplete IFN $\gamma$ . WT mice (8-12 week old) were pre-treated with either an IFN $\gamma$  neutralizing antibody (XMG1.2; 200ng) or an isotype control (IgG1; 200ng) intraperitoneally (i.p.). three days prior to Olig001-SYN delivery to the dorsolateral striatum and every three days over the course of 4 weeks. (Fig 4a).

Four weeks post-transduction, striatal tissue was harvested to assess for neuroinflammation via immunohistochemistry and flow cytometry.

Findings show that XMG1.2 treatment significantly attenuated pro-inflammatory monocyte infiltration and MHCII expression on microglia (Fig 4b and c) in the ipsilateral striatum compared to isotype control. Additionally, XMG1.2 treatment significantly decreased the number of CD4<sup>+</sup> and CD8<sup>+</sup> T cells infiltrating the ipsilateral striatum (Fig 4d). While  $\alpha$ -syn expression was unaffected by XMG1.2 treatment (Fig. 4e), peripheral T cell entry was attenuated confirming that IFN $\gamma$  is mediating  $\alpha$ -syn-induced neuroinflammation.

## **Pharmacologically targeting IFN $\gamma$ attenuates Olig001-SYN mediated demyelination**

Lastly, to determine if XMG1.2 treatment attenuated Olig001-SYN mediated demyelination, Luxol Fast Blue staining was performed on striatal sections from Olig001-SYN treated mice (Fig. 5a). In this regard, XMG1.2 treatment preserved myelin in the dorsolateral striatum, specifically in the corpus callosum, compared to isotype control (Fig. 5b-c). These results show that neutralizing IFN $\gamma$  attenuates Olig001-SYN mediated demyelination, again supporting a role of IFN $\gamma$  expression in Olig001-SYN-mediated demyelination.

## **CD4<sup>+</sup> T cells produce IFN $\gamma$ in response to Olig001-SYN mouse model**

In post-mortem MSA tissue there is evidence of infiltrating CD4<sup>+</sup> and CD8<sup>+</sup> T cells<sup>6</sup> in the parenchyma and increased IFN $\gamma$  in the CSF<sup>15</sup>, while studies in preclinical models have shown that CD4<sup>+</sup> T cells are required for neuroinflammation and demyelination<sup>6</sup>. Similarly, the results presented here, using genetic and pharmacological approaches, show that IFN $\gamma$  is a key mediator of the neuroinflammation and demyelination observed in the Olig001-SYN mouse model. While our previous studies in the Olig001-SYN model suggest IFN $\gamma$  is produced by T cells<sup>6</sup>, it is unclear if other CNS resident and infiltrating immune cells produce IFN $\gamma$  in response to Olig001-SYN expression in oligodendrocytes. To determine which CNS resident and infiltrating immune cells express IFN $\gamma$  as a result of  $\alpha$ -syn overexpression, we used immunohistochemistry, flow cytometry, and a Thy1.1/IFN $\gamma$  reporter mouse where Thy1.1 is expressed from the IFN $\gamma$  promoter<sup>18</sup>. In this mouse, when IFN $\gamma$  is expressed, Thy1.1 is

expressed on the cell surface. Using this reporter model, we isolated mononuclear cells from the dorsolateral striatum of mice treated with Olig001-SYN or Olig001-GFP control (Fig. 6a). Using immunohistochemistry, immune populations known to produce IFN $\gamma$  (CD4 $^{+}$  T cells, CD8 $^{+}$  T cells, NK cells, astrocytes, and microglia) were investigated for Thy1.1 expression (Fig 6b). These lymphocytes (CD45 $^{+}$ ) were analyzed by flow cytometry and our results show that CD4 $^{+}$  T cells expressed the overwhelming majority of Thy1.1 on the cell surface in response to  $\alpha$ -syn overexpression in oligodendrocytes (Fig. 6c) which was significantly elevated as compared to the GFP control. Upon further investigation, the majority of Thy1.1 expressed was found on CD45 $^{+}$  TCRb $^{+}$  CD4 $^{+}$  T cells (Fig 6d-f), matching results seen in the immunohistochemistry (Fig 6b). Given the CD4 $^{+}$  T cells are producing the pathogenic IFN $\gamma$  (Fig 6f) when  $\alpha$ -syn is expressed in oligodendrocytes, these data suggest that the CD4 $^{+}$  T cell subtype, Th1 cells are facilitating the disease process via production of IFN $\gamma$ . In summary, our results show other immune cell types like CD8 $^{+}$  T cells, B cells, and NK cells do not contribute to significant expression of IFN $\gamma$ , but CD4 $^{+}$  T cells drive MSA pathology via IFN $\gamma$  expression.

## Discussion

In this study we show that IFN $\gamma$ , primarily produced by CD4 $^{+}$  T cells, induces neuroinflammation and demyelination in the Olig001-SYN mouse model of MSA. Using a genetic approach in which IFN $\gamma$  was globally knocked out, neuroinflammation and demyelination were attenuated four weeks post vector delivery. Additionally, when IFN $\gamma$  was pharmacology depleted with the IFN $\gamma$  neutralizing antibody (XMG 1.2), there was a significant decrease in activated CNS myeloid populations, MHCII expression, and infiltrating CD4 $^{+}$  and CD8 $^{+}$  T cells. Lastly, using a novel IFN $\gamma$  reporter mouse, we found that the Olig001-SYN mediated increase in IFN $\gamma$  expression originates from CD4 $^{+}$  T cells, suggesting that Th1, not Th17 T cells, are key in facilitating neuroinflammation and demyelination. Overall, our results indicate that IFN $\gamma$  mediates the neuroinflammation and demyelination in this mouse model of MSA, and thus targeting IFN $\gamma$  producing CD4 $^{+}$  T cells may be a future disease modifying therapeutic.

Although there has been extensive research into other demyelinating disease like MS, the role alpha-synuclein in oligodendrocytes play is still unclear<sup>22</sup>. Our results show that

blocking IFN $\gamma$  prevents demyelination (Fig 1-5). Under healthy conditions, cytokines and chemokines can affect oligodendroglial differentiation<sup>23-25</sup>. For example, IFN $\gamma$  stimulates oligodendroglia to present MHCI and MHCII mediated antigens in the context of MS<sup>23,26</sup>. Oligodendrocytes are responsive to IFN $\gamma$  in MSA, still, the mechanism of how oligodendrocytes contribute to disease pathogenesis is unknown. In MSA,  $\alpha$ -syn aggregation contributes to demyelination and inflammation, however, it is unclear if demyelination occurs in a cell autonomous or non-cell autonomous manner<sup>27</sup>. It has been suggested that disease-associated oligodendrocytes participate in crosstalk with astrocytes and microglia to help mediate inflammatory responses<sup>25</sup>. While there is growing evidence for disease associated oligodendrocytes in MS and Alzheimer's disease (AD)<sup>25</sup>, it is currently unknown if there are disease-associated oligodendrocytes and if they communicate with other glia and other immune populations in synucleinopathies such as MSA. Future studies are needed to understand the mechanisms behind  $\alpha$ -syn mediated demyelination, and if oligodendrocytes mediate neuroinflammatory responses in MSA.

In this study, Tbet deficiency resulted in significant attenuation of CD4<sup>+</sup> T cell infiltration, CNS myeloid activation, and infiltrating monocytes, indicating that genetically deleting IFN $\gamma$  attenuates Olig001-SYN mediated neuroinflammation (Fig 1-2). While genetic deletion of Tbet attenuated CD4 T cell infiltration and shifted the T cell repertoire to disease resolving, interestingly, there was a significant increase in CD8<sup>+</sup> T cells. Although unexpected, this observation highlights either a compensatory effect of Tbet deficiency or a possible role of CD8<sup>+</sup> T<sub>regs</sub> in repressing an inflammatory response. Growing evidence in human and mouse MS studies highlight the existence of CD8<sup>+</sup> T<sub>regs</sub>, and their role in suppressing proinflammatory cells like Th1 and Th17<sup>19,20,28</sup>. In human post-mortem MSA tissue, our previous study showed a significant presence of CD8<sup>+</sup> T cells<sup>6</sup>. However, studies in blood have shown a decrease in CD8<sup>+</sup> T cells and a significant shift in the CD4/CD8 ratio favoring CD4<sup>+</sup> T cells<sup>29</sup>. While our previous studies have shown CD4<sup>+</sup> T cells are important in disease progression, there is little evidence in the literature investigating the role of CD8<sup>+</sup> T cells in MSA. Further studies are needed to understand the role of CD8<sup>+</sup> T cells in MSA and whether they mediate neuroinflammatory and neurodegenerative responses via their cytotoxic effector functions.

Using a novel Thy1.1/IFN $\gamma$  reporter mouse model, we were able to show that the majority of Olig001-SYN mediated IFN $\gamma$  production originates from infiltrating CD4<sup>+</sup> T cells. This, combined with the observation that Tbet <sup>-/-</sup> mice and CD4 <sup>-/-</sup> mice show attenuated neuroinflammation and demyelination (Fig 1-3), strongly suggests that Th1 cells are pushing

disease progression in MSA. Although our data suggests that Th1 cells are the main driver of MSA pathology, they are not the only CD4<sup>+</sup> T cell subtype known to be associated with inflammatory or autoimmune disorders<sup>19-21,30</sup>. Th17 cells have been shown to induce demyelination and inflammation in MS<sup>19,20,30</sup> via production of the proinflammatory cytokine IL-17a<sup>21</sup>. While increases in Th17 and IL-17a were observed in the Olig001-SYN model in previous studies, using a ROR $\gamma$ t<sup>-/-</sup> mouse, we were able to show that this pathogenic subtype does not cause the neuroinflammation and demyelination in this model, again supporting the notion that Th17 cells are not key to disease progression (Supplemental Fig 1). Future studies in human post-mortem brain and blood are warranted to determine the role of Th1 and Th17 cells in MSA pathogenesis.

In addition to genetic knockout studies, we also showed that neutralizing IFN $\gamma$  via XMG1.2 treatment was effective in attenuating the neuroinflammation and demyelination in the Olig001-SYN model (Figs 3-5). This observation not only highlighted the importance of IFN $\gamma$  in facilitating MSA pathology, but it also identifies a potential disease-modifying therapeutic modality in MSA. Currently, there are no disease modifying treatments for MSA<sup>1,22</sup>, only limited symptomatic treatments. The symptomatic treatments do not extend the lifespan of MSA patients, as they do not halt or slow disease progression. Current clinical trials are designed to target the accumulation of  $\alpha$ -syn pathology, or active/passive immunization<sup>22,31</sup>. Although early results from preclinical models were promising, most trials were terminated in early phases due to failure to meet primary endpoints or the clinical trial sizes were extremely small. While results in animal models suggest targeting neuroinflammation would be promising<sup>5,32</sup>, new clinical trials have targeted the robust neuroinflammatory response observed in MSA. Approaches to suppress activated microglia or astrogliosis failed in phase II due to patients still presenting with neuroinflammation and rapid clinical decline indicating that a peripheral cell type may be driving disease pathogenesis<sup>22,31</sup>. Intravenous immunoglobulin (IVIG) therapy targeting reactive T cells has shown promising phase II results, however, due to the small trial size, this intervention needs further study and development. The current study identifies the IFN $\gamma$  pathway as a potential disease modifying therapeutic target in a novel mouse model of MSA. Future studies are needed to determine the timing for optimal therapeutic benefit and to determine whether targeting IFN $\gamma$  attenuates neurodegeneration in the human disease.

In conclusion, the results from these studies show that IFN $\gamma$  is a key facilitator of neuroinflammation and demyelination as a result of  $\alpha$ -syn overexpression in the Olig001-SYN

mouse model of MSA. Specifically, genetic knockout or pharmacological approaches targeting IFN $\gamma$  expression or signaling attenuated CNS microglial activation and infiltration of pro-inflammatory monocytes and CD4<sup>+</sup> T cells. Additionally, targeting IFN $\gamma$  expression or signaling attenuated Olig001-SYN mediated loss of oligodendrocytes and demyelination. Using a novel Thy1.1/IFN $\gamma$  reporter mouse, we determined that IFN $\gamma$  was expressed primarily by infiltrating CD4<sup>+</sup> T cells in response to  $\alpha$ -syn overexpression, suggesting Th1 CD4 T cells are key in facilitating inflammation and disease progression. These findings indicate that IFN $\gamma$  represents a potential future disease-modifying therapeutic target in MSA.

## Acknowledgements

The work in these studies was generously supported by NIH/NINDS R01NS107316 (Harms, PI). The authors are grateful for the donation of the Thy1.1/IFN $\gamma$  and hcd2/IL-17a reporter provided by Casey Weaver. We are thankful for all the undergraduates, especially Cameron Gallups, who assisted in various experiments. We are also grateful for the experimental input, discussion, and key reagents provided by Chander Raman. We are also thankful for Vidya Sagar Hanumanthu and the UAB Comprehensive Flow Cytometry Core for their assistance in flow cytometry experiments. Experimental design figures were generated with BioRender.

## Funding

The work from these studies are generously supported by NIH/ NINDS R01NS107316 (A.S.H., PI).

## Competing interests

The authors have no competing interests

## References

1. Fanciulli A, Wenning GK. Multiple-system atrophy. *N Engl J Med*. Jan 15 2015;372(3):249-63. doi:10.1056/NEJMr1311488
2. Ubhi K, Low P, Masliah E. Multiple system atrophy: a clinical and neuropathological perspective. *Trends Neurosci*. Nov 2011;34(11):581-90. doi:10.1016/j.tins.2011.08.003
3. Papp MI, Kahn JE, Lantos PL. Glial cytoplasmic inclusions in the CNS of patients with multiple system atrophy (striatonigral degeneration, olivopontocerebellar atrophy and Shy-Drager syndrome). *J Neurol Sci*. Dec 1989;94(1-3):79-100. doi:10.1016/0022-510x(89)90219-0
4. Tu PH, Galvin JE, Baba M, et al. Glial cytoplasmic inclusions in white matter oligodendrocytes of multiple system atrophy brains contain insoluble alpha-synuclein. *Ann Neurol*. Sep 1998;44(3):415-22. doi:10.1002/ana.410440324
5. Lim S, Chun Y, Lee JS, Lee SJ. Neuroinflammation in Synucleinopathies. *Brain Pathol*. May 2016;26(3):404-9. doi:10.1111/bpa.12371
6. Williams GP, Marmion DJ, Schonhoff AM, et al. T cell infiltration in both human multiple system atrophy and a novel mouse model of the disease. *Acta Neuropathol*. May 2020;139(5):855-874. doi:10.1007/s00401-020-02126-w
7. Mandel RJ, Marmion DJ, Kirik D, et al. Novel oligodendroglial alpha synuclein viral vector models of multiple system atrophy: studies in rodents and nonhuman primates. *Acta Neuropathol Commun*. Jun 16 2017;5(1):47. doi:10.1186/s40478-017-0451-7
8. Powell SK, Khan N, Parker CL, et al. Characterization of a novel adeno-associated viral vector with preferential oligodendrocyte tropism. *Gene Ther*. Nov 2016;23(11):807-814. doi:10.1038/gt.2016.62
9. Marmion DJ, Rutkowski AA, Chatterjee D, et al. Viral-based rodent and nonhuman primate models of multiple system atrophy: Fidelity to the human disease. *Neurobiol Dis*. Jan 2021;148:105184. doi:10.1016/j.nbd.2020.105184
10. Ivashkiv LB. IFNgamma: signalling, epigenetics and roles in immunity, metabolism, disease and cancer immunotherapy. *Nat Rev Immunol*. Sep 2018;18(9):545-558. doi:10.1038/s41577-018-0029-z
11. Deczkowska A, Baruch K, Schwartz M. Type I/II Interferon Balance in the Regulation of Brain Physiology and Pathology. *Trends Immunol*. Mar 2016;37(3):181-192. doi:10.1016/j.it.2016.01.006
12. Sosa RA, Murphey C, Robinson RR, Forsthuber TG. IFN-gamma ameliorates autoimmune encephalomyelitis by limiting myelin lipid peroxidation. *Proc Natl Acad Sci U S A*. Sep 8 2015;112(36):E5038-47. doi:10.1073/pnas.1505955112
13. Arellano G, Ottum PA, Reyes LI, Burgos PI, Naves R. Stage-Specific Role of Interferon-Gamma in Experimental Autoimmune Encephalomyelitis and Multiple Sclerosis. *Front Immunol*. 2015;6:492. doi:10.3389/fimmu.2015.00492
14. Bettelli E, Sullivan B, Szabo SJ, Sobel RA, Glimcher LH, Kuchroo VK. Loss of T-bet, but not STAT1, prevents the development of experimental autoimmune encephalomyelitis. *J Exp Med*. Jul 5 2004;200(1):79-87. doi:10.1084/jem.20031819
15. Compta Y, Dias SP, Giraldo DM, et al. Cerebrospinal fluid cytokines in multiple system atrophy: A cross-sectional Catalan MSA registry study. *Parkinsonism Relat Disord*. Aug 2019;65:3-12. doi:10.1016/j.parkreldis.2019.05.040
16. Starhof C, Winge K, Heegaard NHH, Skogstrand K, Friis S, Hejl A. Cerebrospinal fluid pro-inflammatory cytokines differentiate parkinsonian syndromes. *J Neuroinflammation*. Nov 3 2018;15(1):305. doi:10.1186/s12974-018-1339-6

17. Barcia C, Ros CM, Annese V, et al. IFN-gamma signaling, with the synergistic contribution of TNF-alpha, mediates cell specific microglial and astroglial activation in experimental models of Parkinson's disease. *Cell Death Dis.* Apr 7 2011;2:e142. doi:10.1038/cddis.2011.17
18. Harrington LE, Janowski KM, Oliver JR, Zajac AJ, Weaver CT. Memory CD4 T cells emerge from effector T-cell progenitors. *Nature.* Mar 20 2008;452(7185):356-60. doi:10.1038/nature06672
19. Jin M, Gunther R, Akgun K, Hermann A, Ziemssen T. Peripheral proinflammatory Th1/Th17 immune cell shift is linked to disease severity in amyotrophic lateral sclerosis. *Sci Rep.* Apr 3 2020;10(1):5941. doi:10.1038/s41598-020-62756-8
20. Kamali AN, Noorbakhsh SM, Hamedifar H, et al. A role for Th1-like Th17 cells in the pathogenesis of inflammatory and autoimmune disorders. *Mol Immunol.* Jan 2019;105:107-115. doi:10.1016/j.molimm.2018.11.015
21. Liu Z, Qiu AW, Huang Y, et al. IL-17A exacerbates neuroinflammation and neurodegeneration by activating microglia in rodent models of Parkinson's disease. *Brain Behav Immun.* Oct 2019;81:630-645. doi:10.1016/j.bbi.2019.07.026
22. Sidoroff V, Bower P, Stefanova N, et al. Disease-Modifying Therapies for Multiple System Atrophy: Where Are We in 2022? *J Parkinsons Dis.* 2022;12(5):1369-1387. doi:10.3233/JPD-223183
23. Meijer M, Agirre E, Kabbe M, et al. Epigenomic priming of immune genes implicates oligodendroglia in multiple sclerosis susceptibility. *Neuron.* Apr 6 2022;110(7):1193-1210 e13. doi:10.1016/j.neuron.2021.12.034
24. Pandey S, Shen K, Lee SH, et al. Disease-associated oligodendrocyte responses across neurodegenerative diseases. *Cell Rep.* Aug 23 2022;40(8):111189. doi:10.1016/j.celrep.2022.111189
25. Sadick JS, O'Dea MR, Hasel P, Dykstra T, Faustin A, Liddel SA. Astrocytes and oligodendrocytes undergo subtype-specific transcriptional changes in Alzheimer's disease. *Neuron.* Jun 1 2022;110(11):1788-1805 e10. doi:10.1016/j.neuron.2022.03.008
26. Jakel S, Agirre E, Mendanha Falcao A, et al. Altered human oligodendrocyte heterogeneity in multiple sclerosis. *Nature.* Feb 2019;566(7745):543-547. doi:10.1038/s41586-019-0903-2
27. Valdinocci D, Radford RAW, Goulding M, Hayashi J, Chung RS, Pountney DL. Extracellular Interactions of Alpha-Synuclein in Multiple System Atrophy. *Int J Mol Sci.* Dec 19 2018;19(12)doi:10.3390/ijms19124129
28. Levescot A, Cerf-Bensussan N. Regulatory CD8(+) T cells suppress disease. *Science.* Apr 15 2022;376(6590):243-244. doi:10.1126/science.abp8243
29. Cao B, Chen X, Zhang L, et al. Elevated Percentage of CD3(+) T-Cells and CD4(+)/CD8(+) Ratios in Multiple System Atrophy Patients. *Front Neurol.* 2020;11:658. doi:10.3389/fneur.2020.00658
30. Tuzlak S, Dejean AS, Iannacone M, et al. Repositioning TH cell polarization from single cytokines to complex help. *Nat Immunol.* Oct 2021;22(10):1210-1217. doi:10.1038/s41590-021-01009-w
31. Lemos M, Wenning GK, Stefanova N. Current experimental disease-modifying therapeutics for multiple system atrophy. *J Neural Transm (Vienna).* Oct 2021;128(10):1529-1543. doi:10.1007/s00702-021-02406-z
32. Valera E, Spencer B, Fields JA, et al. Combination of alpha-synuclein immunotherapy with anti-inflammatory treatment in a transgenic mouse model of multiple system atrophy. *Acta Neuropathol Commun.* Jan 5 2017;5(1):2. doi:10.1186/s40478-016-0409-1

## Figures and Figure legends

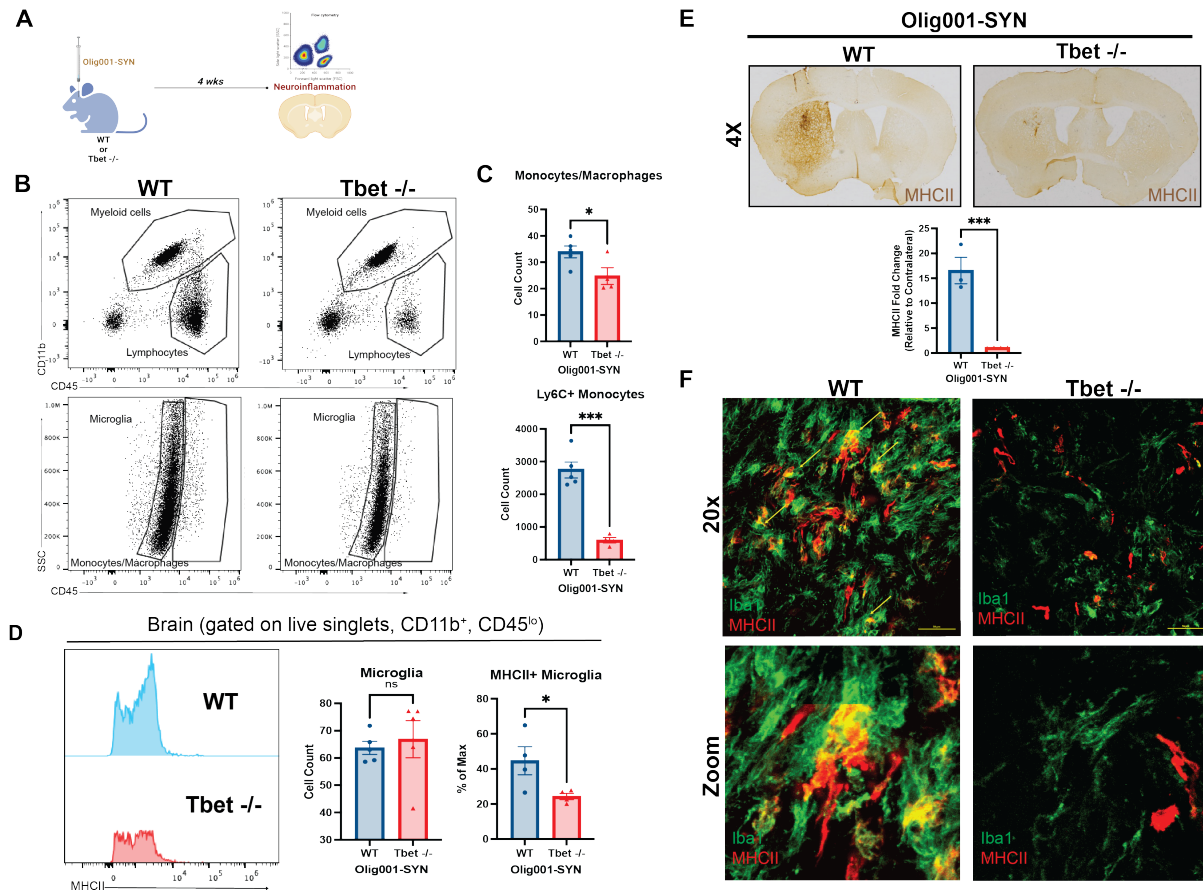

**Figure 1: Tbet<sup>-/-</sup> attenuates myeloid responses in the Olig001-SYN mouse model of MSA.**

(A) Tbet<sup>-/-</sup> mice or their WT littermates 8-12 weeks of age received bilateral (flow cytometry) or unilateral (immunohistochemistry) stereotaxic injections of Olig001-SYN into the dorsal lateral striatum. 4 weeks post-injection, tissue was collected to assess for neuroinflammation. (B) Flow cytometry on isolated striatal tissues, displaying both myeloid (CD45<sup>+</sup>, CD11b<sup>+</sup>) and lymphocyte populations (CD45<sup>+</sup>, CD11b<sup>-</sup>) (top); the resident microglia (CD45<sup>lo</sup>, CD11b<sup>+</sup>) and monocytes/macrophages (CD45<sup>hi</sup>, CD11b<sup>+</sup>) (bottom). (C) Quantification of flow cytometry showing the cell count of MHCII on resident microglia. Mean values are plotted +/- SEM, unpaired t-test, ns = no significance, \*p, 0.05. (D) The quantification of total monocytes/macrophages (CD45<sup>hi</sup>, CD11b<sup>+</sup>) and infiltrating monocytes (CD45<sup>hi</sup>, CD11b<sup>+</sup>, Ly6C<sup>+</sup>) isolated from the striatum with flow cytometry. Mean values are plotted +/- SEM, unpaired t-test, \*p < 0.05, \*\*\*p < 0.0005. (E) Representative images of 3,3'Diaminobenzidine (DAB) staining and quantification of mean gray value of the MHCII expression in the dorsal

lateral striatum. Mean values are plotted  $\pm$  SEM, unpaired t-test, \*\*\* $p < 0.0005$ . (F) Representative images depicting MHCII expression (red) on activated microglia (Iba1, green) in the dorsal lateral striatum. Scale bars are at 50 $\mu$ M. For immunohistochemistry experiments,  $n=3$  mice per group. For flow cytometry experiments  $n=3-5$  (2 mouse striatum tissues pooled per  $n$ ) per group.

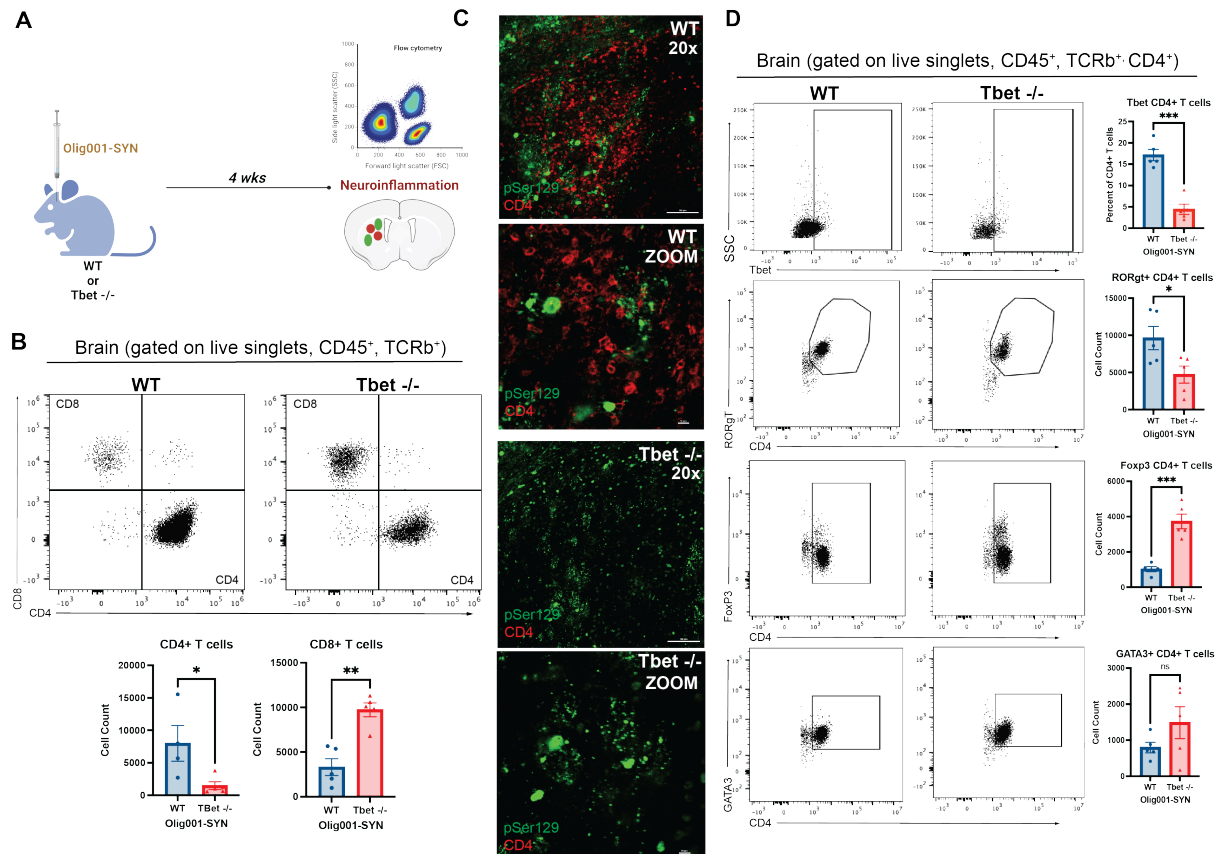

**Figure 2: Tbet<sup>-/-</sup> attenuates CD4<sup>+</sup> T cells and alters T cell subsets.** (A) At 8-12 weeks, Tbet<sup>-/-</sup> or littermate controls were stereotactically injected with Olig001-SYN into the dorsal lateral striatum. After 4 weeks, tissue was harvested to assess for neuroinflammation. (B) Flow cytometry dot plots of CD8<sup>+</sup> (CD45<sup>+</sup>, CD11b<sup>-</sup>, TCRb<sup>+</sup>, CD8<sup>+</sup>) and CD4<sup>+</sup> T cells (CD45<sup>+</sup>, CD11b<sup>-</sup>, TCRb<sup>+</sup>, CD4<sup>+</sup>). Below the dot plots are the cell counts of CD4<sup>+</sup> and CD8<sup>+</sup> T cells in the striatum in the presence of  $\alpha$ -syn pathology within oligodendrocytes. Mean values are plotted  $\pm$  SEM, unpaired t-test, \* $p < 0.05$ , \*\* $p < 0.01$ . (C) Representative immunohistochemistry images of pSer129 (green) and CD4<sup>+</sup> (red) in the dorsal lateral striatum of Tbet<sup>-/-</sup> mice and their littermate controls. (D) Flow cytometry graphs and their corresponding quantification for the following CD4<sup>+</sup> T cell subsets: Th1, Th17, T<sub>reg</sub>, Th2. Mean values are plotted  $\pm$  SEM, unpaired t-test, ns = no significance, \* $p < 0.05$ , \*\*\* $p < 0.0005$ .

For immunohistochemistry experiments, n=3 mice per group. For flow cytometry experiments n=5 (2 mouse striatum tissues pooled per n) per group.

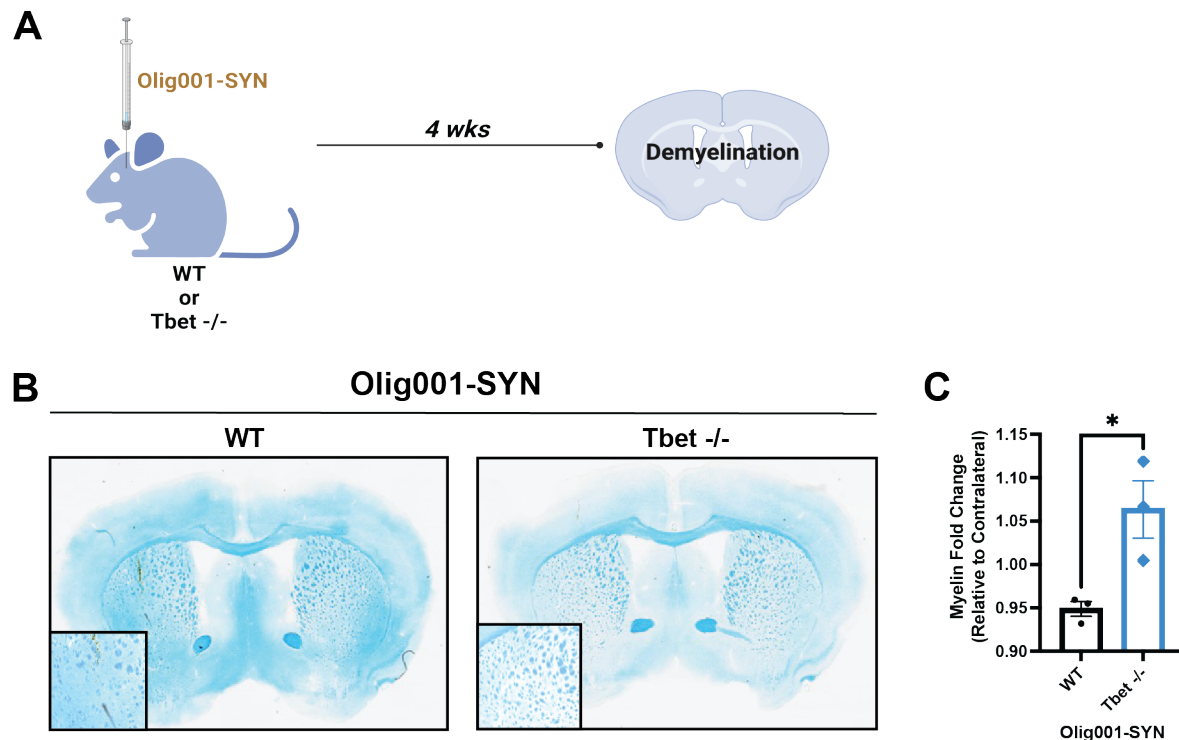

**Figure 3: Tbet -/- attenuates demyelination.** (A) Both male and female Tbet -/- mice and littermate controls were transduced with Olig001-SYN at 8-12 weeks old. 4 weeks post transduction, tissue was collected and stained with Luxol Fast Blue to determine demyelination in the striatum and corpus collosum. (B) Representative Luxol Fast Blue images of WT and Tbet -/- where myelinated areas are stained in blue. (C) Quantification of the myelin fold change between the ipsi- and contralateral sides of the striatum and corpus collosum in WT and Tbet -/- mice. Mean values are plotted +/- SEM, unpaired t-test, \*p < 0.05. For immunohistochemistry experiments, n=3 mice per group.

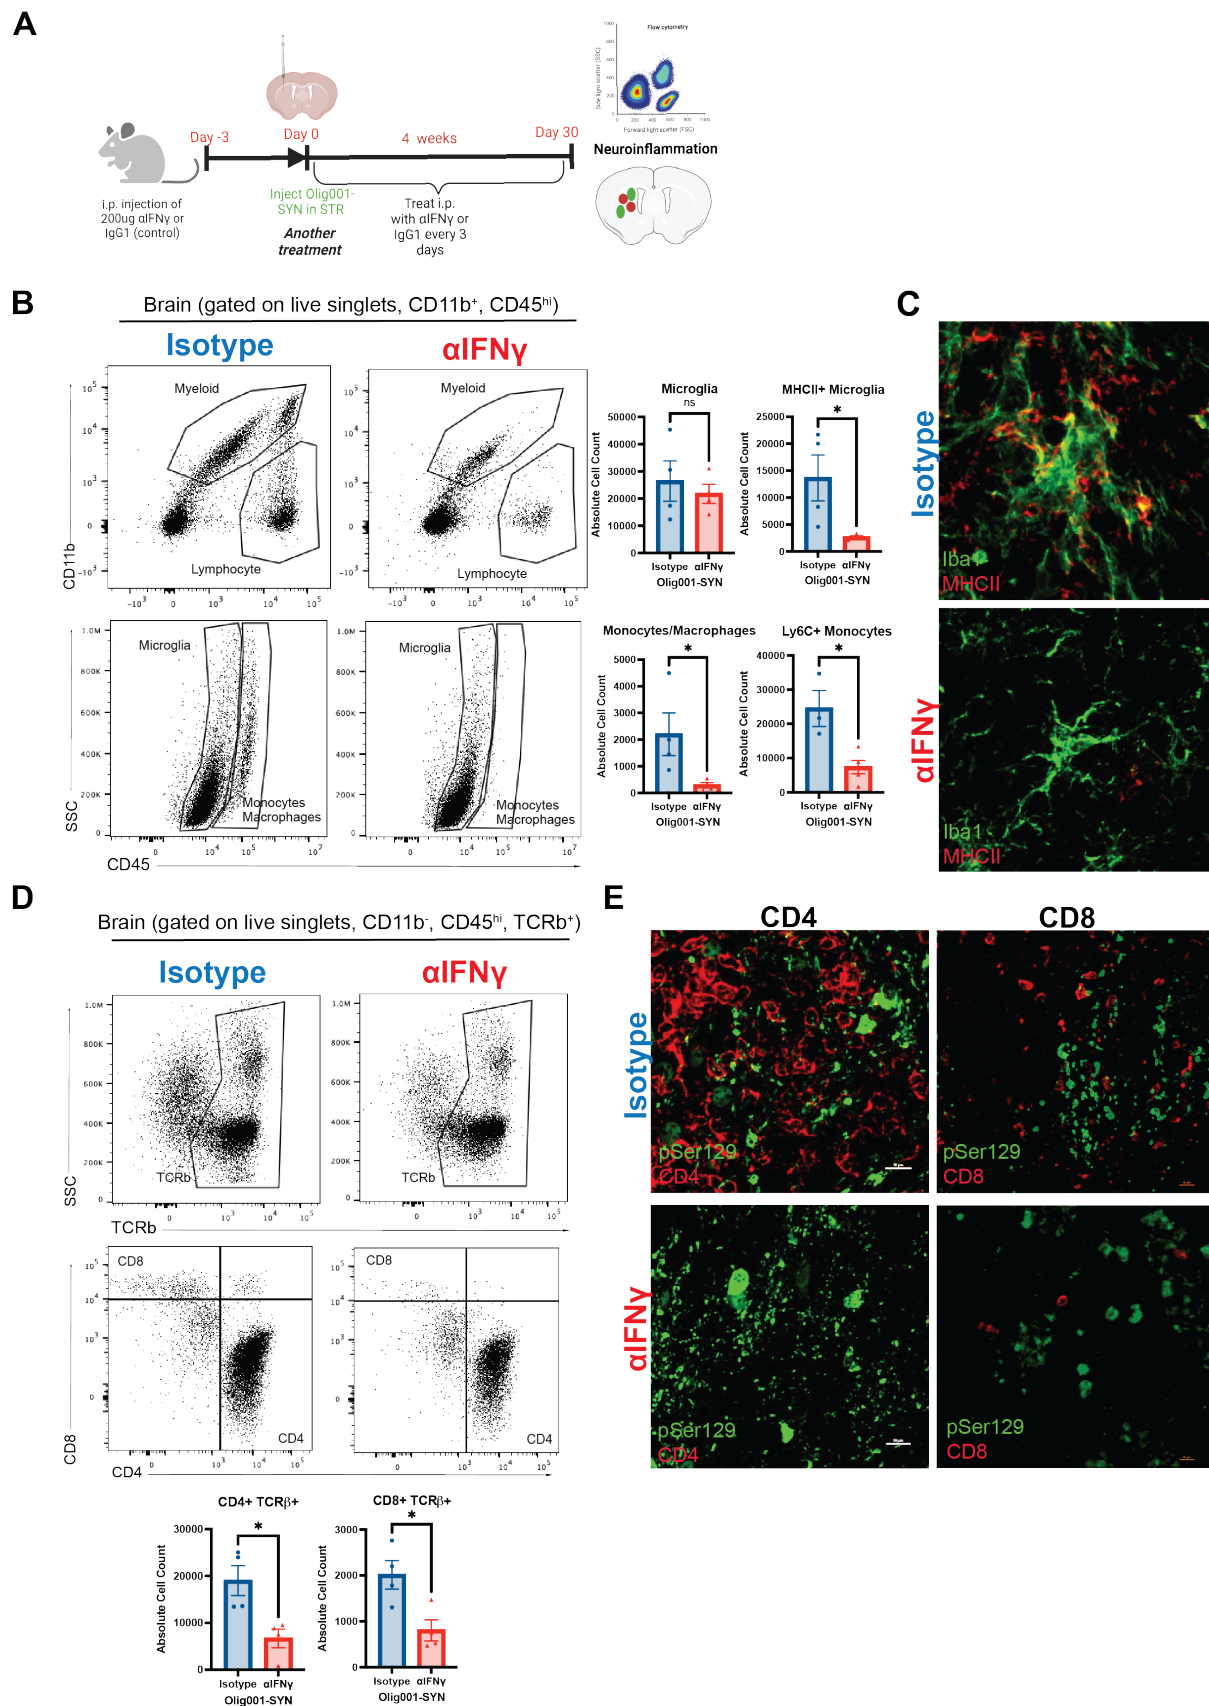

**Figure 4: Neutralizing IFN $\gamma$  attenuates neuroinflammation.** (A) Three days prior to Olig001-SYN transduction, both WT female and male 8-12 week old mice received an i.p.

injection of 200ng of anti-IFN $\gamma$  (XMG1.2) or its isotype control (IgG1). Three days later, Olig001-SYN was transduced into the striatum and received another treatment. Afterwards mice received follow up treatments every three days for 30 days. After the 30 days, tissue was collected to assess for neuroinflammation. **(B)** Dot plots displaying the overall myeloid populations (CD45<sup>+</sup>, CD11b<sup>+</sup>) and lymphocytes (CD45<sup>+</sup>, CD11b<sup>-</sup>). Below are dot plots of microglia (CD45<sup>mid</sup>, CD11b<sup>+</sup>) and monocytes/macrophages (CD45<sup>hi</sup>, CD11b<sup>+</sup>). Mean values are plotted  $\pm$  SEM, unpaired t-test, ns = no significance, \* $p$  < 0.05. **(C)** Representative immunohistochemistry of Iba1 (green) and MHCII (red) positive cells within the striatum and corpus collosum. **(D)** flow cytometry of mononuclear TCRb<sup>+</sup> (CD45<sup>+</sup>, CD11b<sup>-</sup>, TCRb<sup>+</sup>), CD4<sup>+</sup> (CD45<sup>+</sup>, CD11b<sup>-</sup>, TCRb<sup>+</sup>) and CD8<sup>+</sup> T cells (CD45<sup>+</sup>, CD11b<sup>-</sup>, TCRb<sup>+</sup>). Mean values are plotted  $\pm$  SEM, unpaired t-test, \* $p$  < 0.05. **(E)** representative immunohistochemistry images of CD4<sup>+</sup> and CD8<sup>+</sup> T cells (red) and insoluble alpha-synuclein, pSer129 (green) in the striatum. For immunohistochemistry experiments,  $n$ =3 mice per group. For flow cytometry experiments  $n$ =4 (2 mouse striatum tissues pooled per  $n$ ) per group.

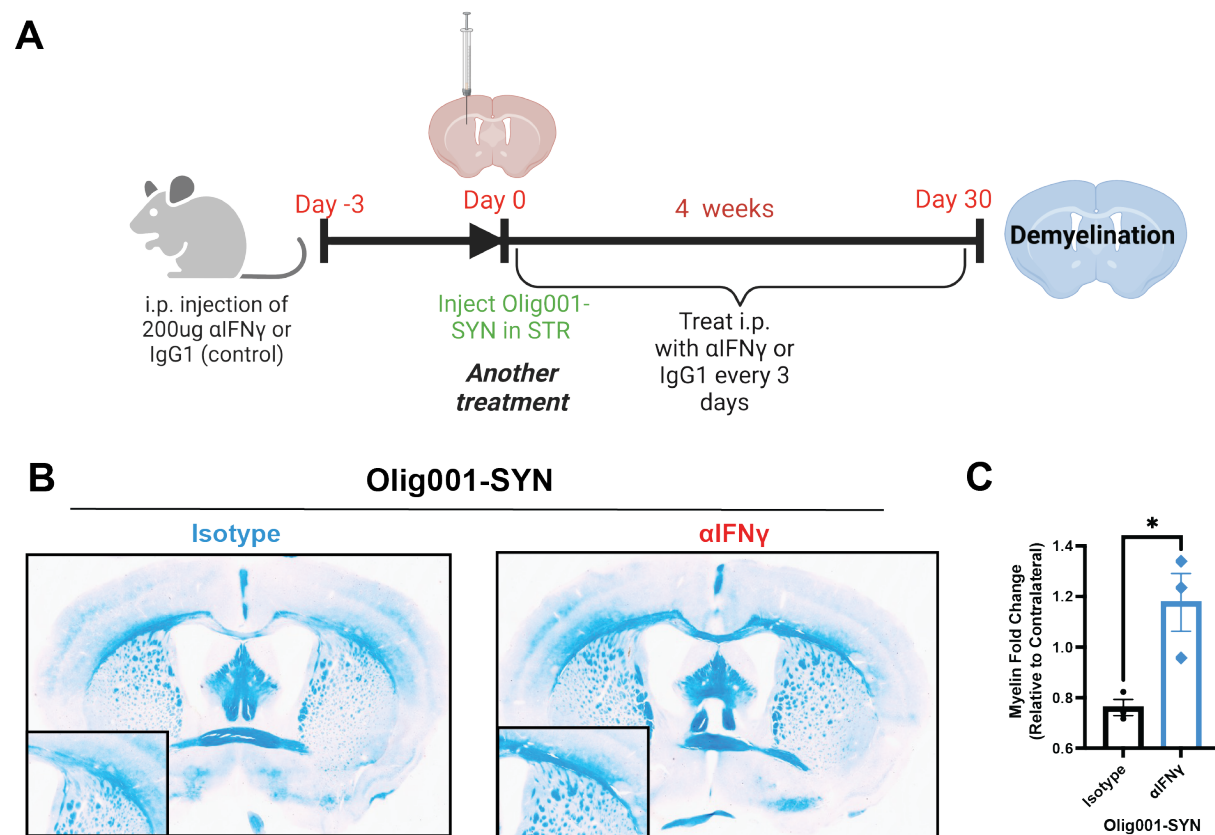

**Figure 5: Neutralizing IFN $\gamma$  attenuates demyelination.** (A) Same experiment design that was used in assessing neuroinflammation in Figure 4. (B) Representative images of Luxol Fast Blue staining displaying myelin within the striatum. Boxes in the bottom left are zooms of areas of demyelination. (C) Myelin fold change between ipsi- and contralateral sides of the striatum and corpus collosum. Mean values are plotted  $\pm$  SEM, unpaired t-test, \* $p$  < 0.05. For immunohistochemistry experiments,  $n$ =3 mice per group.

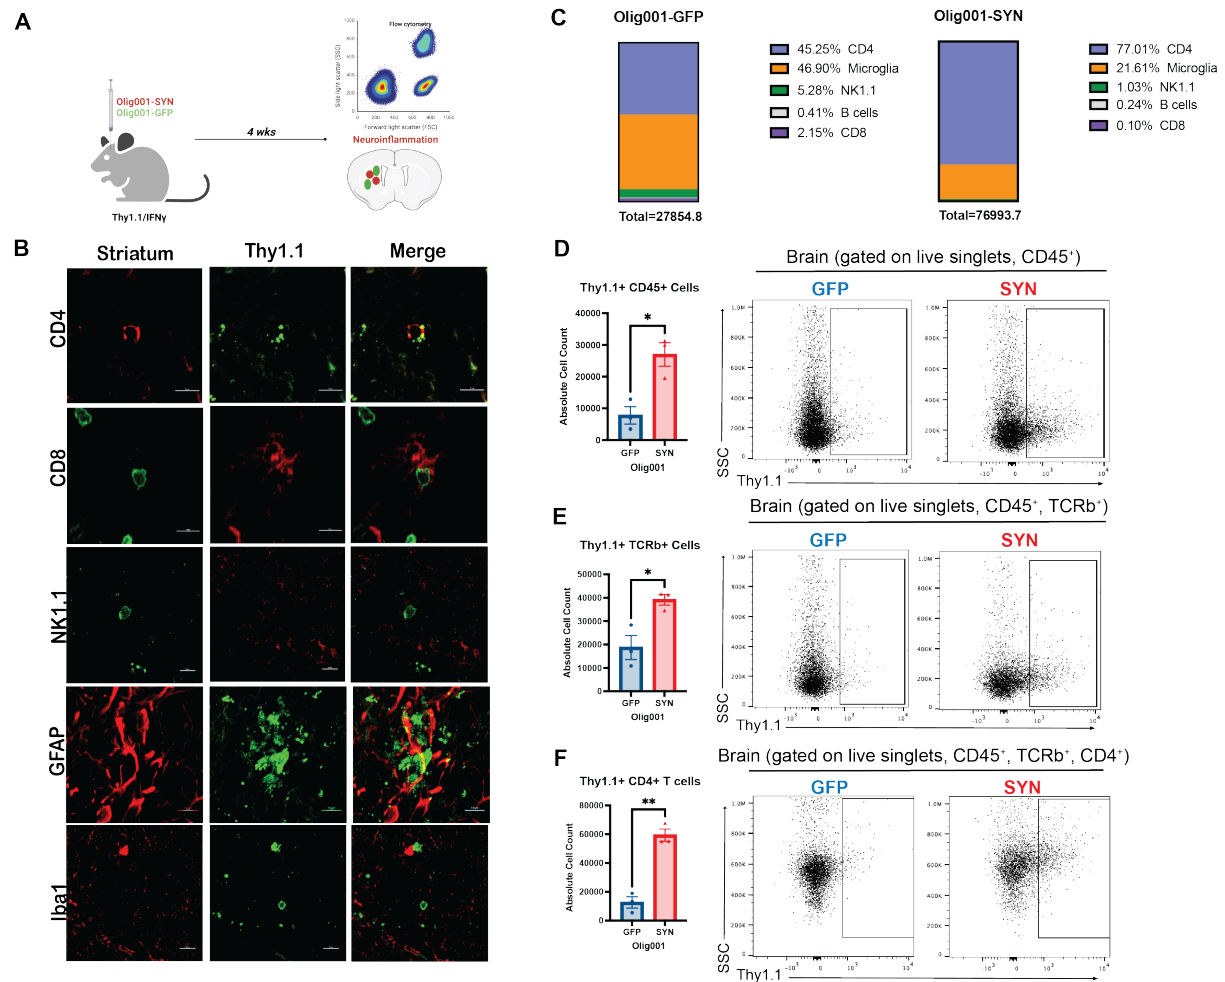

**Figure 6: Proinflammatory IFN $\gamma$  is produced by CD4<sup>+</sup> T cells.** (A) Male and female 8–12-week-old Thy1.1/IFN $\gamma$  reporter mice were injected with either Olig001-GFP or Olig001-SYN in the dorsal lateral striatum. 4 weeks post-transduction, tissue was harvested for neuroinflammation. (B) A panel of representative immunohistochemistry images of CD4<sup>+</sup> T cells (CD4), CD8<sup>+</sup> T cells (CD8), NK cells (NK1.1), astrocytes (GFAP), and microglia (Iba1) with the IFN $\gamma$  reporter Thy1.1. (C) Percentages of CD45<sup>+</sup> cells generated from flow cytometry data looking at Thy1.1<sup>+</sup> (IFN $\gamma$  producing) cells. (D) Dot plots between Olig001-GFP and Olig001-SYN injected Thy1.1/IFN $\gamma$  reporter mice showing Thy1.1<sup>+</sup> cells in lymphocytes (CD45<sup>+</sup>, CD11b<sup>-</sup>). Mean values are plotted  $\pm$  SEM, unpaired t-test, \* $p$  < 0.05. (E) Flow

cytometry dot plots of Thy1.1+ TCRb+ T cells (CD45+, CD11b-, TCRb+, Thy1.1+). Mean values are plotted +/- SEM, unpaired t-test, \* $p < 0.05$ . (F) Flow cytometry showing Thy1.1+ CD4+ T cells (CD45+, CD11b-, TCRb+, CD4+, Thy1.1+). Mean values are plotted +/- SEM, unpaired t-test, \* $p < 0.05$ . For immunohistochemistry experiments,  $n=3$  mice per group. For flow cytometry experiments  $n=3$  (2 mouse striatum tissues pooled per  $n$ ) per group.
